# Supplementary material
Source: ML conference proceedings conference paper supplement (https://openaccess.thecvf.com/content/CVPR_2019/html/Wang_Learning_Channel-Wise_Interactions_CVPR_2019_paper.html)
Supplement: Supplementary file 1 [file Wang_Learning_Channel-Wise_Interactions_CVPR_2019_supplemental.pdf]

## Supplementary A: Formulation of (6)

$p(a_\tau|s_\tau)$  in Equation (6) is entangled by actions for exploring edge existence and influence, and the probability to choose influence is deterministic and non-differentiable. In order to back-propagate gradients, we approximate the optimization problem. It is apparent the existence and influence are independent, so we rewrite the gradient:

$$\nabla_\theta Z = -\mathbb{E}_\pi[r_\tau(s_\tau, a_\tau)(\nabla_\theta \log p(a_\tau^e|s_\tau) + \nabla_\theta \log p(a_\tau^i|s_\tau))]$$

where  $a_\tau^e$  means the action to change existence of the graph i.e. creation, deletion and unchange edges and  $a_\tau^i$  represents the choice of parameters for influence i.e. the value of  $K_{ts}^l$ .

As for the former transition probability of existence, we denote  $-\mathbb{E}_\pi[r_\tau(s_\tau, a_\tau)\nabla_\theta \log p(a_\tau^e|s_\tau)]$  as  $L^e$  and rewrite it as follows:

$$\begin{aligned} L^e &= -\mathbb{E}_\pi[r_\tau(s_\tau, a_\tau)((\nabla_\theta \log p(a_\tau^{e,c}|s_\tau) + \\ &\nabla_\theta \log p(a_\tau^{e,d}|s_\tau, a_\tau^{e,c}) + \nabla_\theta \log p(a_\tau^{e,u}|s_\tau, a_\tau^{e,c}, a_\tau^{e,d})))] \\ &= -\mathbb{E}_\pi[r_\tau(s_\tau, a_\tau)((\frac{\partial \log p(a_\tau^{e,c}|s_\tau)}{\partial W_{et}^l} \frac{\partial W_{et}^l}{\partial \theta} + \\ &\frac{\partial \log p(a_\tau^{e,d}|s_\tau, a_\tau^{e,c})}{\partial W_{et}^l} \frac{\partial W_{et}^l}{\partial \theta} + 0))] \\ &= -\mathbb{E}_\pi[r_\tau(s_\tau, a_\tau)((\frac{\partial \log p(a_\tau^{e,c}|s_\tau)}{\partial W_{et}^l} \frac{\partial W_{et}^l}{\partial \theta} + \\ &\alpha \frac{\partial \log p(a_\tau^{e,d}|s_\tau, a_\tau^{e,c})}{\partial W_{et}^l} \text{inv}(W_{et}^l) \frac{\partial W_{et}^l}{\partial \theta})))] \end{aligned} \quad (1)$$

where  $\text{inv}(W)$  means a matrix whose elements are reciprocal with those in  $W$  and  $\alpha$  is a small hyperparameter to approximate the derivative of normalizing  $W_{et}^l$  because it is computationally expensive.

Since the sampling strategy for influence is deterministic, we apply a symmetric clip function to approximate the integral of delta distribution. At first, we explicitly write the probability of actions for influence selection:

$$p(a_\tau^i|s_\tau) = \begin{cases} \int_{-\frac{|a_\tau^i|-1}{2K_0}}^{-\frac{|a_\tau^i|-3}{2K_0}} \delta(t - W_{it}^l) dt & a_\tau^i < 0 \\ \int_{\frac{|a_\tau^i|-3}{2K_0}}^{\frac{|a_\tau^i|-1}{2K_0}} \delta(t - W_{it}^l) dt & a_\tau^i > 0 \end{cases} \quad (2)$$

It is apparent that  $\log p(a_\tau^i|s_\tau)$  is non-differentiable of  $W_{it}^l$ . For any element  $w_{it}^l \in W_{it}^l$ , we use the following

function to substitute original objective:

$$p(a_\tau^i|s_\tau) \approx \begin{cases} 2K_0 w_{it}^l - a_\tau^i + 3 & w_{it}^l \in (\frac{a_\tau^i-3}{2K_0}, \frac{a_\tau^i-2}{2K_0}) \cup w_{it}^l \geq 0 \\ -2K_0 w_{it}^l + a_\tau^i - 1 & w_{it}^l \in (\frac{a_\tau^i-2}{2K_0}, \frac{a_\tau^i-1}{2K_0}) \cup w_{it}^l \geq 0 \\ 2K_0 w_{it}^l - a_\tau^i - 1 & w_{it}^l \in (\frac{a_\tau^i+1}{2K_0}, \frac{a_\tau^i+2}{2K_0}) \cup w_{it}^l < 0 \\ -2K_0 w_{it}^l + a_\tau^i + 3 & w_{it}^l \in (\frac{a_\tau^i+2}{2K_0}, \frac{a_\tau^i+3}{2K_0}) \cup w_{it}^l < 0 \end{cases} \quad (3)$$

We can rewrite the gradient for updating the parameters in the policy network to learn the influence in REINFORCE algorithm. We use  $L_i$  to substitute  $-\mathbb{E}_\pi[r_\tau(s_\tau, a_\tau)\nabla_\theta \log p(a_\tau^i|s_\tau)]$  as follows:

$$L_i = -\mathbb{E}_\pi[r_\tau(s_\tau, a_\tau) \cdot 2K_0 \cdot \frac{w_{it}^l - \frac{|a_\tau^i|-2}{2K_0} \frac{a_\tau^i}{|a_\tau^i|}}{|w_{it}^l - \frac{|a_\tau^i|-2}{2K_0} \frac{a_\tau^i}{|a_\tau^i|}|}] \quad (4)$$

where the logarithm in the original gradient is removed for simplicity.

In summary, the approximation of the expected gradient can be written as follows:

$$\begin{aligned} \nabla_\theta Z_{approx} &= -\frac{1}{M} \sum_{k=1}^M R_k \sum_{\tau=0}^{T_k} (\frac{\partial \log p(a_\tau^{e,c}|s_\tau)}{\partial W_{et}^l} \frac{\partial W_{et}^l}{\partial \theta} + \\ &\alpha \frac{\partial \log p(a_\tau^{e,d}|s_\tau, a_\tau^{e,c})}{\partial W_{et}^l} \text{inv}(W_{et}^l) \frac{\partial W_{et}^l}{\partial \theta} + 2K_0 \cdot \frac{W_{it}^l - \frac{|a_\tau^i|-2}{2K_0} \frac{a_\tau^i}{|a_\tau^i|}}{|W_{it}^l - \frac{|a_\tau^i|-2}{2K_0} \frac{a_\tau^i}{|a_\tau^i|}|}) \end{aligned} \quad (5)$$
